# Supplementary material for: Transported aerosols regulate the pre-monsoon rainfall over north-east India: a WRF-Chem modelling study
Source: Copernicus journal article supplement (doi:10.5194/acp-23-6197-2023), 2023-06-07
Supplement: Supplementary file 1 [file acp-23-6197-2023-supplement.pdf]

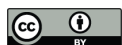

*Supplement of*

## **Transported aerosols regulate the pre-monsoon rainfall over north-east India: a WRF-Chem modelling study**

**Neeldip Barman and Sharad Gokhale**

*Correspondence to:* Sharad Gokhale (sharadbg@iitg.ac.in)

The copyright of individual parts of the supplement might differ from the article licence.

Table S1: Model performance statistics for meteorological parameters

|                           | Bangalore | Delhi  | Guwahati | Kolkata | Mumbai | Patna  |
|---------------------------|-----------|--------|----------|---------|--------|--------|
| <b>Temperature</b>        |           |        |          |         |        |        |
| RMSE (°C)                 | 2.58      | 2.23   | 2.88     | 4.02    | 2.61   | 1.89   |
| IOA                       | 0.91      | 0.94   | 0.75     | 0.79    | 0.80   | 0.95   |
| ME (°C)                   | -2.32     | -0.34  | -1.97    | -3.16   | -1.99  | -0.74  |
| <b>Relative humidity</b>  |           |        |          |         |        |        |
| RMSE (%)                  | 9.33      | 8.71   | 11.21    | 15.68   | 10.49  | 11.63  |
| IOA                       | 0.97      | 0.92   | 0.79     | 0.79    | 0.85   | 0.91   |
| ME (%)                    | 0.06      | 0.53   | 3.09     | 12.09   | 3.99   | 5.98   |
| <b>Wind speed</b>         |           |        |          |         |        |        |
| RMSE (m s <sup>-1</sup> ) | 1.47      | 1.91   | 1.84     | 1.90    | 1.44   | 2.11   |
| IOA                       | 0.49      | 0.59   | 0.40     | 0.48    | 0.83   | 0.55   |
| ME (m s <sup>-1</sup> )   | 0.51      | -0.22  | -0.35    | 0.07    | -0.71  | 1.22   |
| <b>Wind direction</b>     |           |        |          |         |        |        |
| RMSE (°)                  | 44.06     | 108.48 | 146.95   | 64.29   | 76.91  | 104.87 |
| IOA                       | 0.79      | 0.72   | 0.47     | 0.43    | 0.68   | 0.75   |
| ME (°)                    | -18.48    | 10.28  | 6.07     | 22.41   | 14.23  | -26.17 |

Table S2: Model performance statistics for chemical species compared against MERRA2

| <b>NOR-I</b>               |           |        |         |        |        |          |
|----------------------------|-----------|--------|---------|--------|--------|----------|
|                            | <b>BC</b> |        |         |        |        |          |
|                            | BANGALORE | DELHI  | KOLKATA | MUMBAI | PATNA  | GUWAHATI |
| RMSE (µg m <sup>-3</sup> ) | 1.49      | 20.03  | 27.31   | 47.12  | 7.12   | 1.04     |
| IOA                        | 0.44      | 0.13   | 0.03    | 0.01   | 0.28   | 0.48     |
| ME (µg m <sup>-3</sup> )   | 0.74      | 13.81  | 21.71   | 32.84  | 3.81   | 0.00     |
| <b>Dust</b>                |           |        |         |        |        |          |
| RMSE (µg m <sup>-3</sup> ) | 18.85     | 122.19 | 32.02   | 82.17  | 64.17  | 33.40    |
| IOA                        | 0.41      | 0.33   | 0.35    | 0.35   | 0.35   | 0.26     |
| ME (µg m <sup>-3</sup> )   | -15.13    | -76.40 | -30.09  | -76.21 | -50.50 | -31.91   |
| <b>Organic Carbon</b>      |           |        |         |        |        |          |
| RMSE (µg m <sup>-3</sup> ) | 2.57      | 34.63  | 49.02   | 87.04  | 12.12  | 4.64     |
| IOA                        | 0.71      | 0.24   | 0.07    | 0.02   | 0.51   | 0.50     |
| ME (µg m <sup>-3</sup> )   | 0.73      | 24.55  | 38.29   | 60.88  | 3.87   | -1.41    |
| <b>Sulfate</b>             |           |        |         |        |        |          |
| RMSE (µg m <sup>-3</sup> ) | 1.66      | 4.36   | 2.43    | 3.34   | 7.48   | 4.12     |
| IOA                        | 0.42      | 0.56   | 0.68    | 0.36   | 0.35   | 0.30     |
| ME (µg m <sup>-3</sup> )   | -0.16     | 3.19   | 0.58    | 2.87   | 5.11   | -2.22    |
| <b>NOR</b>                 |           |        |         |        |        |          |

|                                  | BC             |        |         |        |        |          |
|----------------------------------|----------------|--------|---------|--------|--------|----------|
|                                  | BANGALORE      | DELHI  | KOLKATA | MUMBAI | PATNA  | GUWAHATI |
| RMSE<br>( $\mu\text{g m}^{-3}$ ) | 0.69           | 7.13   | 15.14   | 24.16  | 2.86   | 0.77     |
| IOA                              | 0.64           | 0.29   | 0.06    | 0.02   | 0.51   | 0.61     |
| ME<br>( $\mu\text{g m}^{-3}$ )   | 0.48           | 5.76   | 13.21   | 19.76  | 2.16   | 0.11     |
|                                  | Dust           |        |         |        |        |          |
| RMSE<br>( $\mu\text{g m}^{-3}$ ) | 18.43          | 120.49 | 29.71   | 74.03  | 57.77  | 20.48    |
| IOA                              | 0.40           | 0.23   | 0.36    | 0.38   | 0.33   | 0.39     |
| ME<br>( $\mu\text{g m}^{-3}$ )   | -14.52         | -61.58 | -26.64  | -65.36 | -40.90 | -18.49   |
|                                  | Organic carbon |        |         |        |        |          |
| RMSE<br>( $\mu\text{g m}^{-3}$ ) | 1.44           | 11.21  | 25.73   | 44.48  | 5.34   | 3.64     |
| IOA                              | 0.81           | 0.51   | 0.14    | 0.04   | 0.70   | 0.61     |
| ME<br>( $\mu\text{g m}^{-3}$ )   | 0.44           | 8.61   | 22.04   | 36.26  | 0.02   | -2.02    |
|                                  | Sulfate        |        |         |        |        |          |
| RMSE<br>( $\mu\text{g m}^{-3}$ ) | 1.56           | 3.48   | 1.88    | 3.99   | 3.30   | 3.04     |
| IOA                              | 0.38           | 0.45   | 0.73    | 0.31   | 0.60   | 0.30     |
| ME<br>( $\mu\text{g m}^{-3}$ )   | -0.30          | 1.63   | 0.12    | 3.61   | 1.27   | -1.62    |

Table S3: Model performance statistics for chemical species compared against observation stations. RMSE and ME units in  $\mu\text{g m}^{-3}$ .

|          |                   | NOR   |      |        | NOR-I |      |        |
|----------|-------------------|-------|------|--------|-------|------|--------|
|          |                   | RMSE  | IOA  | ME     | RMSE  | IOA  | ME     |
| DELHI    | NO                | 24.82 | 0.35 | -23.28 | 23.86 | 0.36 | -22.48 |
|          | NO <sub>2</sub>   | 30.22 | 0.17 | 28.47  | 35.58 | 0.14 | 33.22  |
|          | PM <sub>10</sub>  | 37.87 | 0.48 | -19.65 | 73.84 | 0.37 | -47.57 |
|          | PM <sub>2.5</sub> | 15.72 | 0.62 | -10.12 | 21.15 | 0.62 | 15.14  |
| KANPUR   | NO                | 42.17 | 0.43 | -36.42 | 42.38 | 0.43 | -36.65 |
|          | NO <sub>2</sub>   | 54.22 | 0.25 | -53.52 | 59.32 | 0.22 | -58.60 |
|          | PM <sub>2.5</sub> | 24.10 | 0.48 | -20.02 | 17.70 | 0.43 | -9.34  |
|          | SO <sub>2</sub>   | 20.44 | 0.45 | 18.49  | 10.97 | 0.53 | 8.90   |
| PATNA    | NO                | 12.18 | 0.35 | -10.69 | 12.14 | 0.35 | -10.67 |
|          | NO <sub>2</sub>   | 8.79  | 0.55 | -0.60  | 8.49  | 0.57 | 0.06   |
|          | PM <sub>2.5</sub> | 55.62 | 0.22 | -55.28 | 49.78 | 0.21 | -48.48 |
| SILIGURI | NO                | 5.77  | 0.25 | -5.64  | 5.77  | 0.24 | -5.64  |
|          | NO <sub>2</sub>   | 14.17 | 0.42 | -9.90  | 16.94 | 0.22 | -16.76 |
|          | PM <sub>10</sub>  | 22.28 | 0.52 | -19.53 | 30.07 | 0.44 | -27.76 |
|          | PM <sub>2.5</sub> | 14.51 | 0.52 | -12.90 | 14.27 | 0.52 | -12.94 |

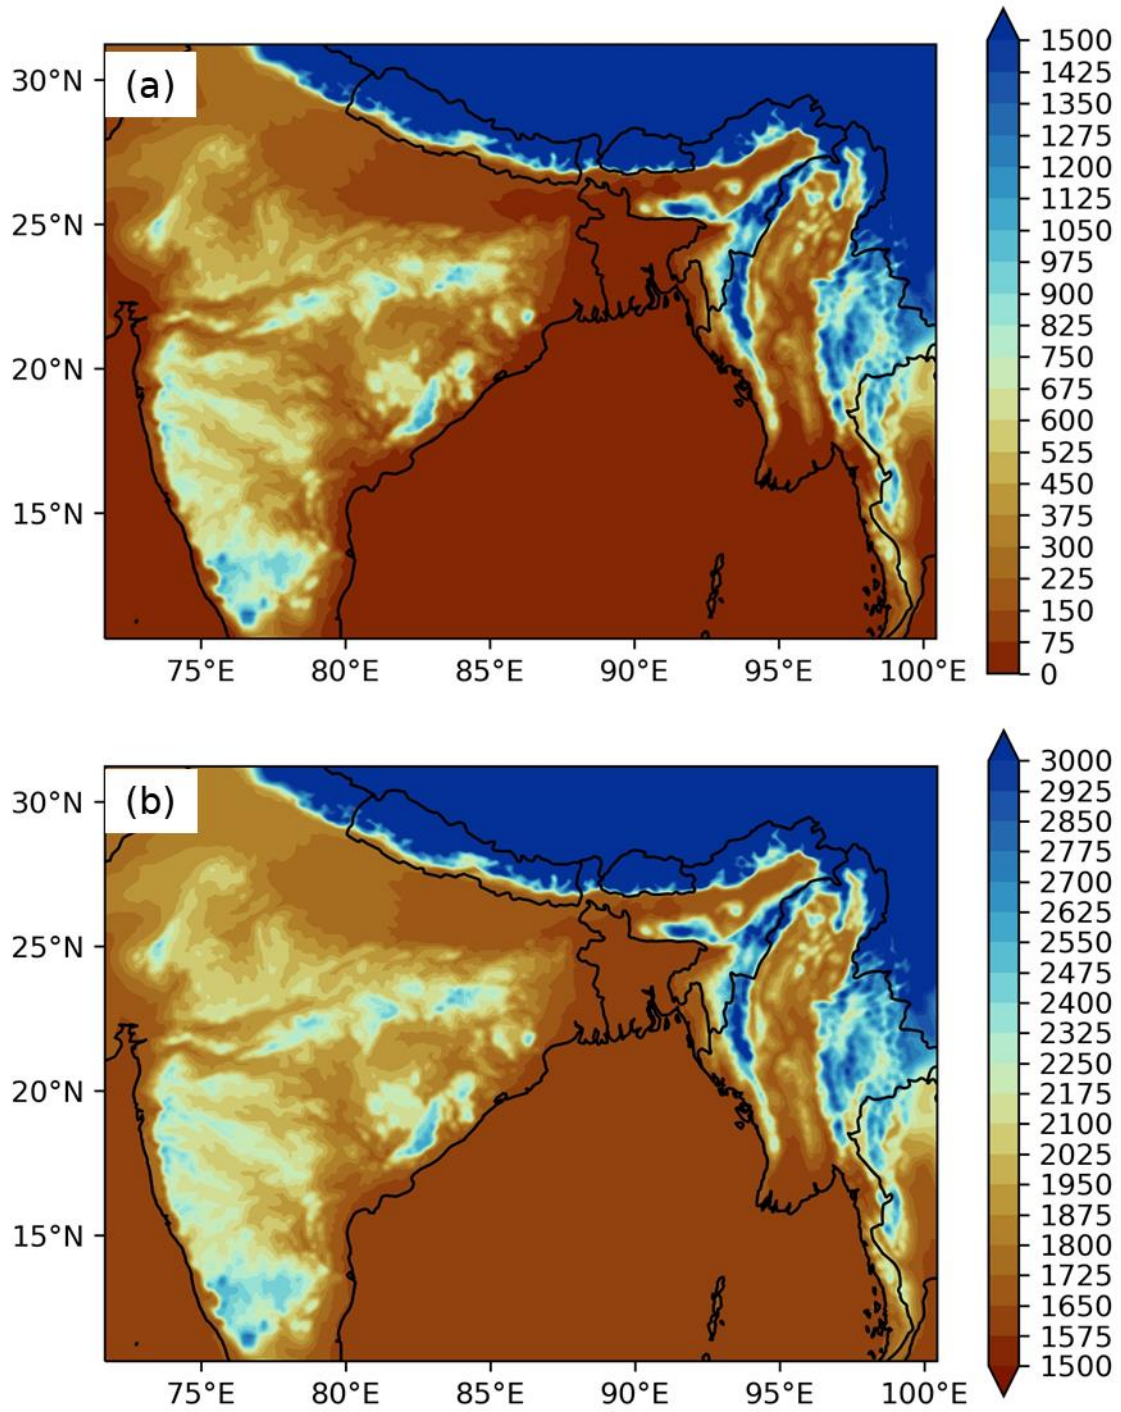

Figure S1: Spatial distributions of geopotential heights (m) of model level a) 0 (near surface) b) 15

Table S4: Region-wise PM<sub>10</sub> concentration ( $\mu\text{g m}^{-3}$ ) in different scenarios at different atmospheric heights

| Model level | No_EMISS_NE |       | Only_EMISS_NE |      | NOR-I |       | (No_EMISS_NE/<br>(No_EMISS_NE +<br>Only_EMISS_NE))*100% |       |
|-------------|-------------|-------|---------------|------|-------|-------|---------------------------------------------------------|-------|
|             | 0           | 15    | 0             | 15   | 0     | 15    | 0                                                       | 15    |
| Region 1    | 18.18       | 32.67 | 6.49          | 1.01 | 30.25 | 42.99 | 73.70                                                   | 97.00 |
| Region 2    | 12.78       | 21.70 | 6.33          | 1.14 | 26.64 | 33.75 | 66.86                                                   | 95.02 |
| Region 3    | 5.25        | 7.33  | 3.43          | 0.90 | 12.69 | 12.39 | 60.48                                                   | 89.03 |
| Region 4    | 21.62       | 36.01 | 16.03         | 0.88 | 40.12 | 47.38 | 57.43                                                   | 97.62 |
| Average     | 14.46       | 24.43 | 8.07          | 0.98 | 27.43 | 34.13 | 64.18                                                   | 96.14 |

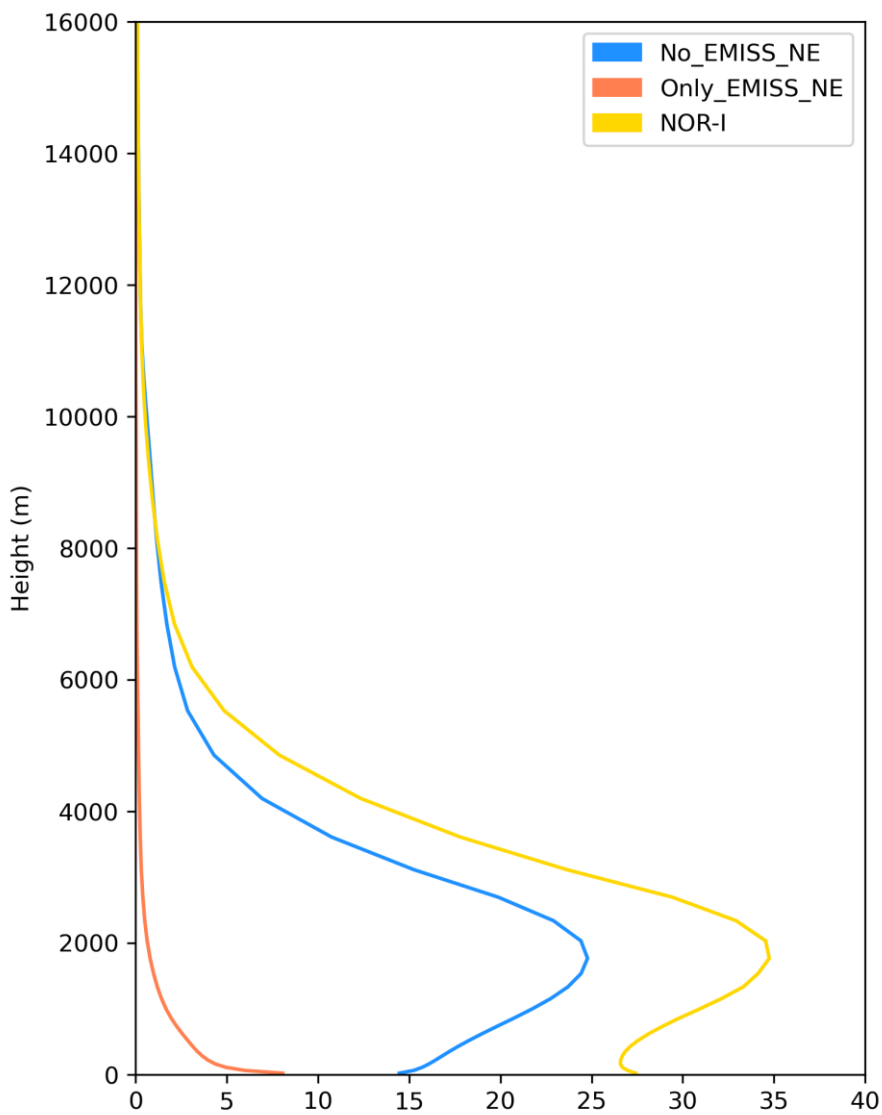

Figure S2: Regional average vertical profile of PM<sub>10</sub> concentration ( $\mu\text{g m}^{-3}$ ) in different scenarios

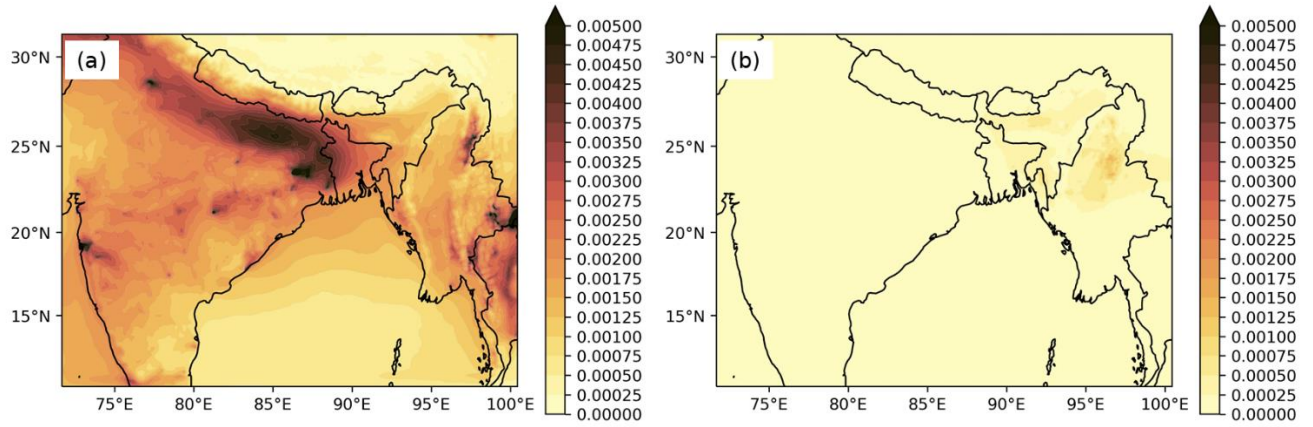

Figure S3: Spatial distribution of column integrated BC mass ( $\text{g m}^{-2}$ ) in a) No\_EMISS\_NE b) Only\_EMISS\_NE

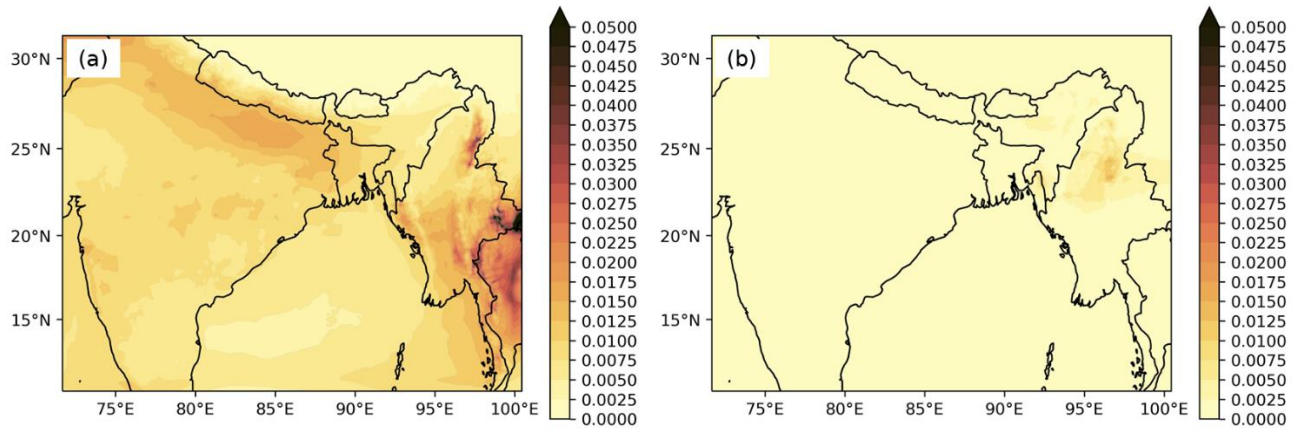

Figure S4: Spatial distribution of column integrated organic carbon mass ( $\text{g m}^{-2}$ ) in a) No\_EMISS\_NE b) Only\_EMISS\_NE

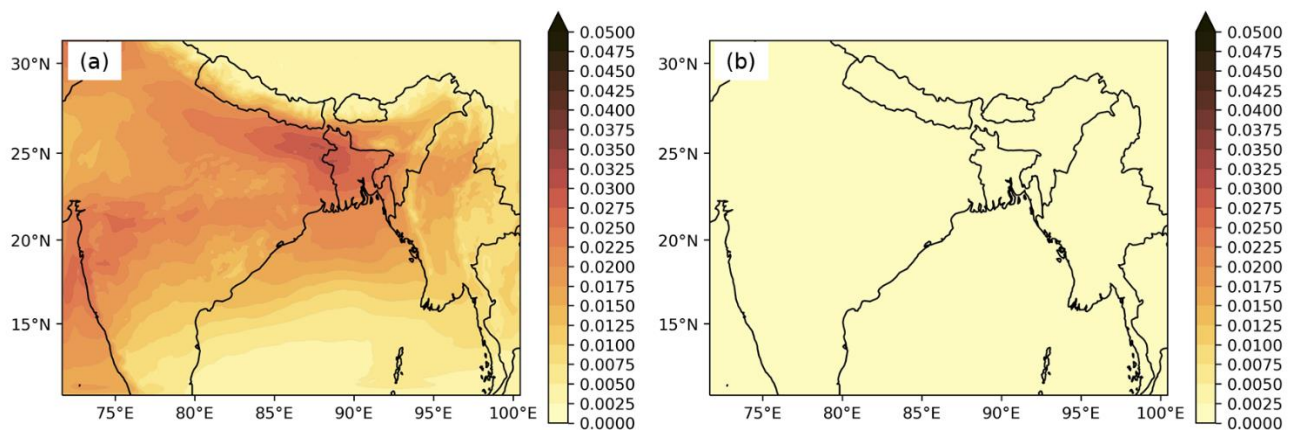

Figure S5: Spatial distribution of column integrated sulfate mass ( $\text{g m}^{-2}$ ) in a) No\_EMISS\_NE b) Only\_EMISS\_NE

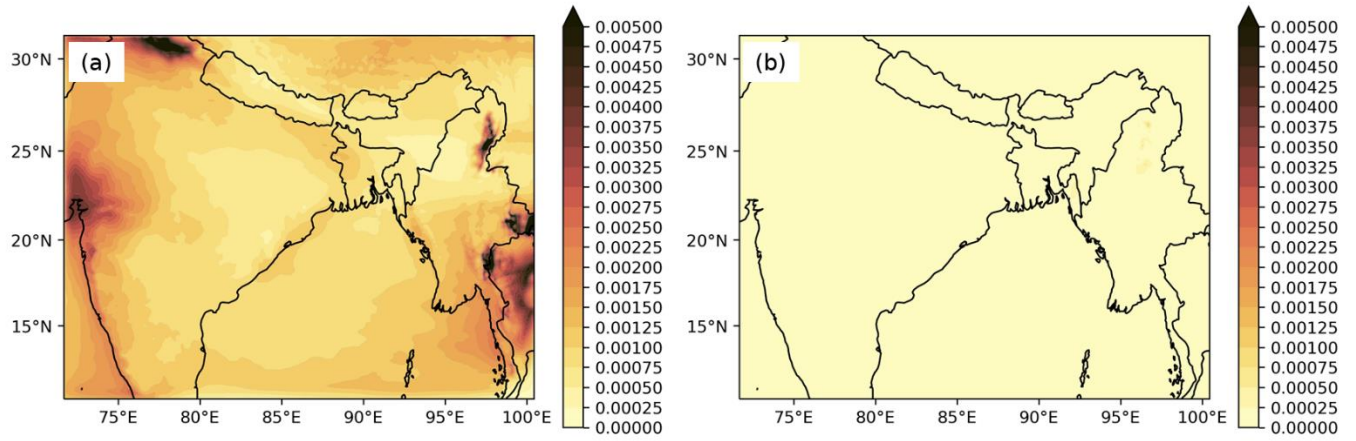

Figure S6: Spatial distribution of column integrated nitrate mass ( $\text{g m}^{-2}$ ) in a) No\_EMISS\_NE b) Only\_EMISS\_NE

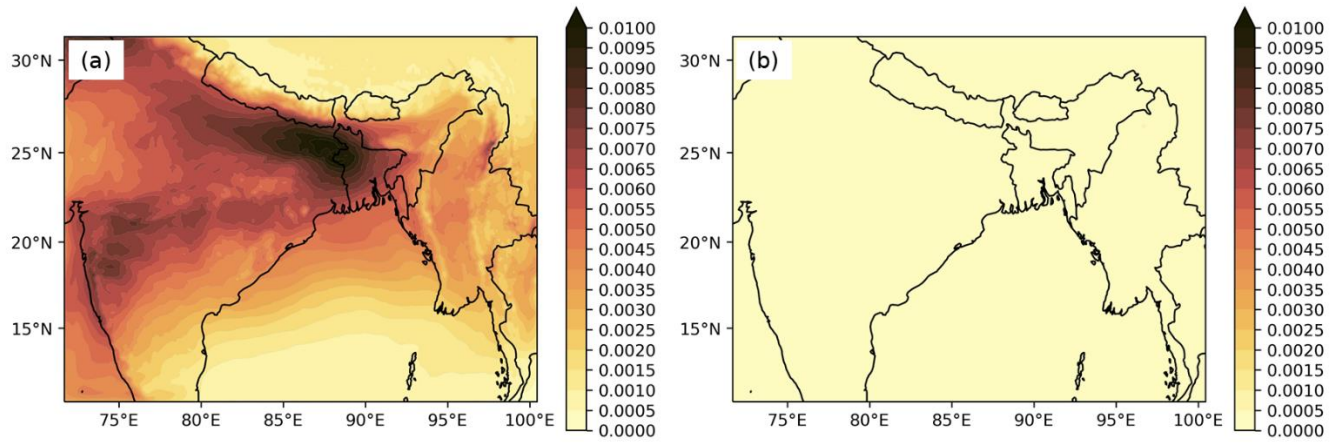

Figure S7: Spatial distribution of column integrated ammonium mass ( $\text{g m}^{-2}$ ) in a) No\_EMISS\_NE b) Only\_EMISS\_NE

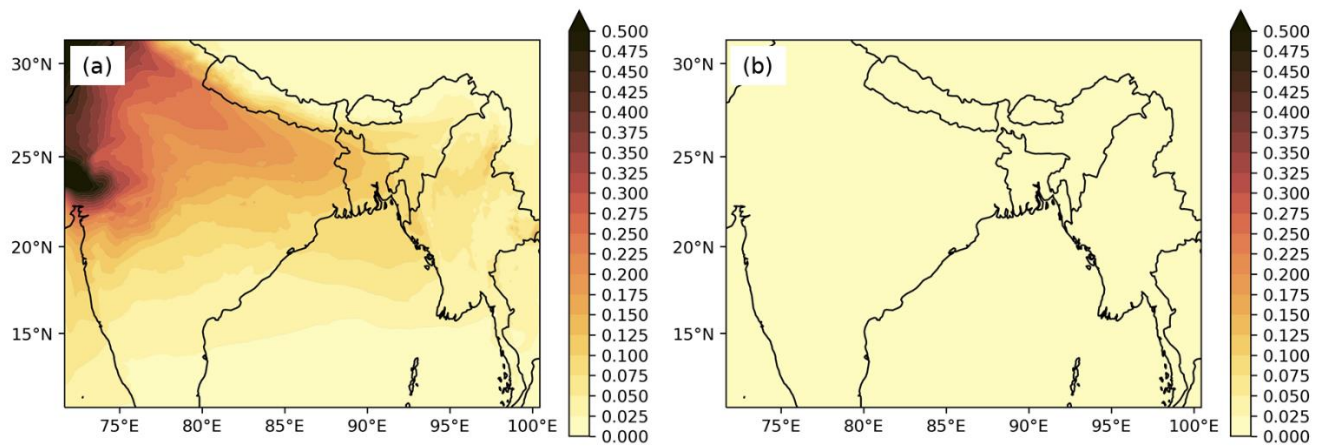

Figure S8: Spatial distribution of column integrated dust mass ( $\text{g m}^{-2}$ ) in a) No\_EMISS\_NE b) Only\_EMISS\_NE



## Aerosol effects of local and transported aerosols on radiative forcing

At surface,

$$\text{Net total RF} = \text{NOR-I}_{((\text{SWDNB}+\text{LWDNB})-(\text{SWUPB}+\text{LWUPB}))} - \text{NOCHEM}_{((\text{SWDNB}+\text{LWDNB})-(\text{SWUPB}+\text{LWUPB}))}$$

$$\text{Net indirect RF} = \text{NOFEED-I}_{((\text{SWDNB}+\text{LWDNB})-(\text{SWUPB}+\text{LWUPB}))} - \text{NOCHEM}_{((\text{SWDNB}+\text{LWDNB})-(\text{SWUPB}+\text{LWUPB}))}$$

$$\text{Net direct + semi-direct RF} = \text{NOR-I}_{((\text{SWDNB}+\text{LWDNB})-(\text{SWUPB}+\text{LWUPB}))} - \text{NOFEED-I}_{((\text{SWDNB}+\text{LWDNB})-(\text{SWUPB}+\text{LWUPB}))}$$

$$\text{Net direct RF} = \text{NOR-I}_{((\text{SWDNBC}+\text{LWDNBC})-(\text{SWUPBC}+\text{LWUPBC}))} - \text{NOFEED-I}_{((\text{SWDNBC}+\text{LWDNBC})-(\text{SWUPBC}+\text{LWUPBC}))}$$

$$\text{Net semi-direct RF} = (\text{Direct} + \text{semi-direct RF}) - \text{Net direct RF}$$

At TOA,

$$\text{Net total RF} = \text{NOR-I}_{((\text{SWDNT}+\text{LWDNT})-(\text{SWUPT}+\text{LWUPT}))} - \text{NOCHEM}_{((\text{SWDNT}+\text{LWDNT})-(\text{SWUPT}+\text{LWUPT}))}$$

$$\text{Net indirect RF} = \text{NOFEED-I}_{((\text{SWDNT}+\text{LWDNT})-(\text{SWUPT}+\text{LWUPT}))} - \text{NOCHEM}_{((\text{SWDNT}+\text{LWDNT})-(\text{SWUPT}+\text{LWUPT}))}$$

$$\text{Net direct + semi-direct RF} = \text{NOR-I}_{((\text{SWDNT}+\text{LWDNT})-(\text{SWUPT}+\text{LWUPT}))} - \text{NOFEED-I}_{((\text{SWDNT}+\text{LWDNT})-(\text{SWUPT}+\text{LWUPT}))}$$

$$\text{Net direct RF} = \text{NOR-I}_{((\text{SWDNTC}+\text{LWDNTC})-(\text{SWUPTC}+\text{LWUPTC}))} - \text{NOFEED-I}_{((\text{SWDNTC}+\text{LWDNTC})-(\text{SWUPTC}+\text{LWUPTC}))}$$

$$\text{Net semi-direct RF} = (\text{Direct} + \text{semi-direct RF}) - \text{Net direct RF}$$

$$\text{Thus, Net atmospheric RF} = \text{Total RF}_{\text{TOA}} - \text{Total RF}_{\text{SURFACE}}$$

Similarly, the short-wave (SW) or long-wave (LW) was similarly found by using either or SW or LW radiation instead of combined radiations. NOR-I was replaced by No\_EMISS\_NE or Only\_EMISS\_NE while NOFEED was replaced by No\_EMISS\_NE\_NOFEED or Only\_EMISS\_NE\_NOFEED to find contributions of local and transported aerosols.

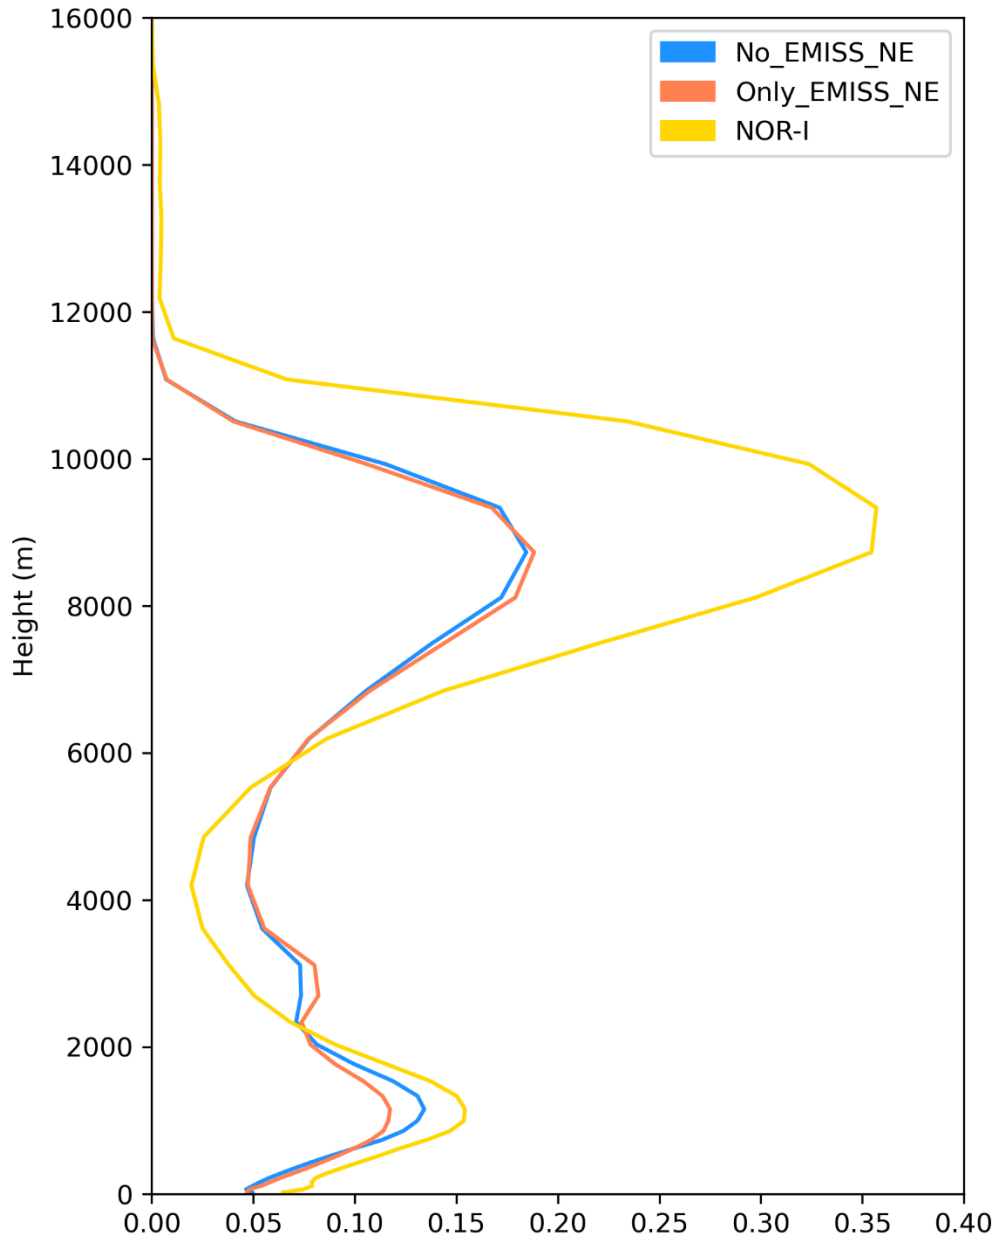

Figure S9: Regional average vertical profile of cloud cover in different scenarios

Table S5: Changes in total rainfall (mm) due to different aerosol effects in different scenarios

|               |          | Total aerosol effect | Direct + Semi-direct | Indirect |
|---------------|----------|----------------------|----------------------|----------|
| NOR-I         | Region 1 | -100.60              | -13.21               | -87.39   |
|               | Region 2 | -71.93               | -1.34                | -70.59   |
|               | Region 3 | -102.60              | -2.49                | -100.11  |
|               | Total    | -275.13              | -17.04               | -258.09  |
| No_EMISS_NE   | Region 1 | -29.81               | -18.37               | -11.44   |
|               | Region 2 | -21.52               | -5.88                | -15.64   |
|               | Region 3 | -21.73               | 0.30                 | -22.04   |
|               | Total    | -73.06               | -23.95               | -49.11   |
| Only_EMISS_NE | Region 1 | -26.81               | -6.23                | -20.57   |
|               | Region 2 | 2.48                 | -0.17                | 2.65     |
|               | Region 3 | -0.12                | -2.01                | 1.89     |
|               | Total    | -24.45               | -8.42                | -16.04   |

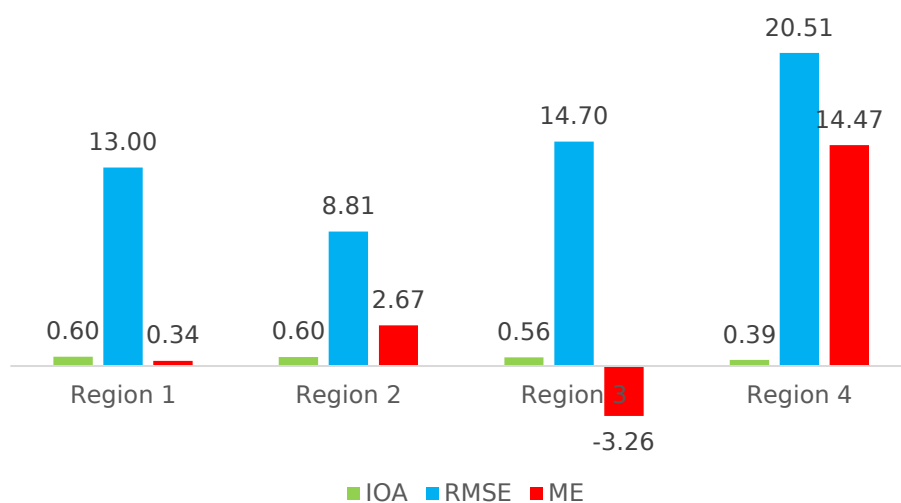

Figure S10: Region wise rainfall evaluation statistics with NOR-I. RMSE and ME in mm day<sup>-1</sup>

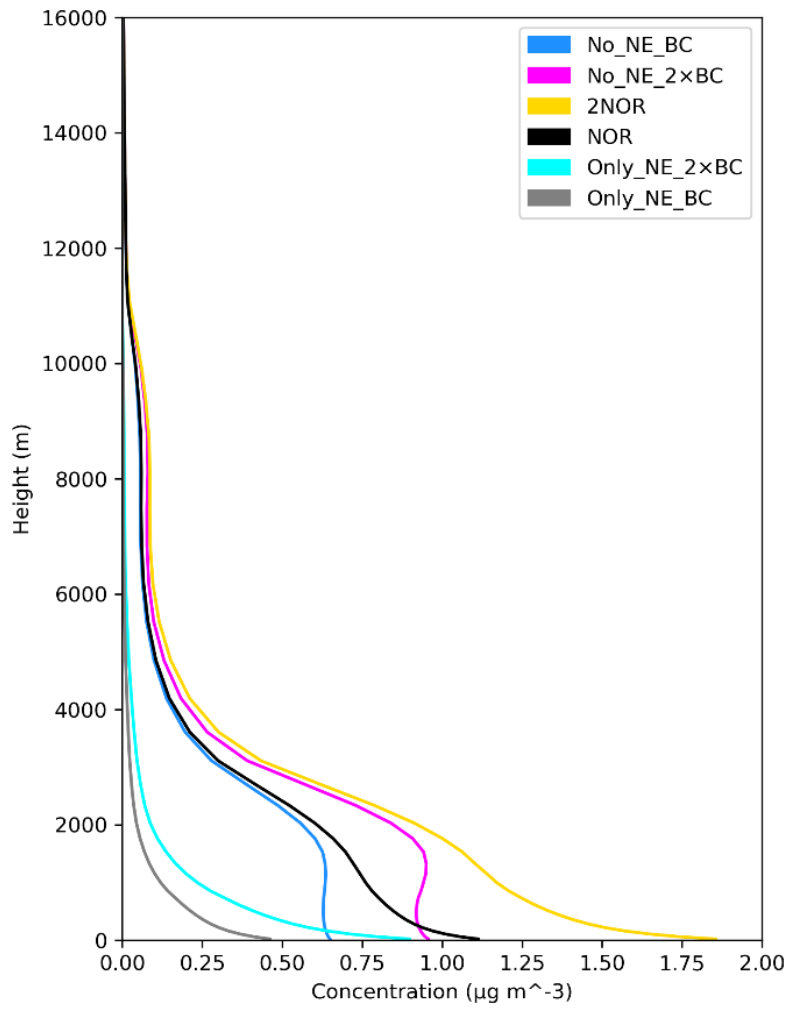

Figure S11: Regionally averaged vertical profiles of BC concentration ( $\mu\text{g m}^{-3}$ ) in different scenarios

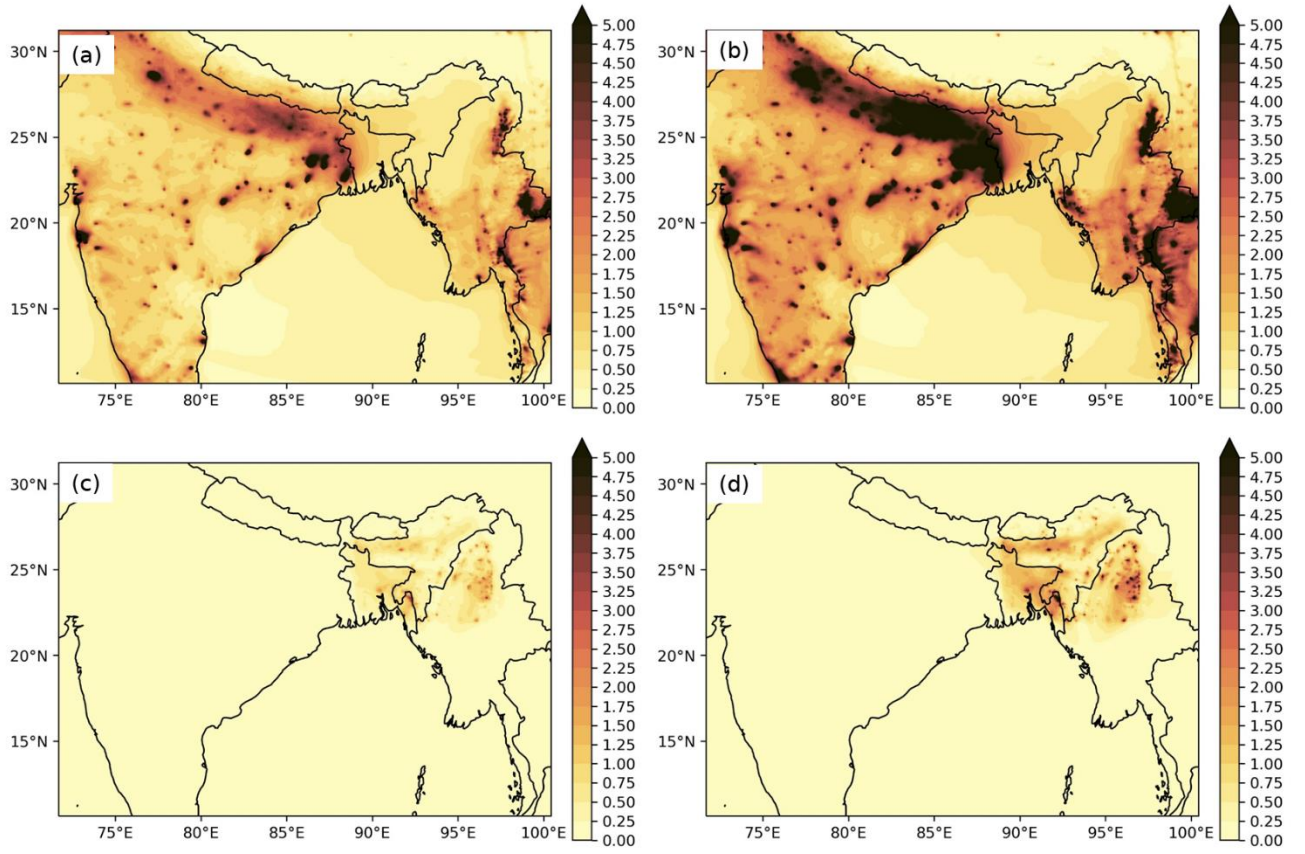

Figure S12: Spatial distributions of near surface (model level 0) BC concentration ( $\mu\text{g m}^{-3}$ ) in a) No\_NE\_BC b) No\_NE\_2xBC c) Only\_NE\_BC d) Only\_NE\_2xBC

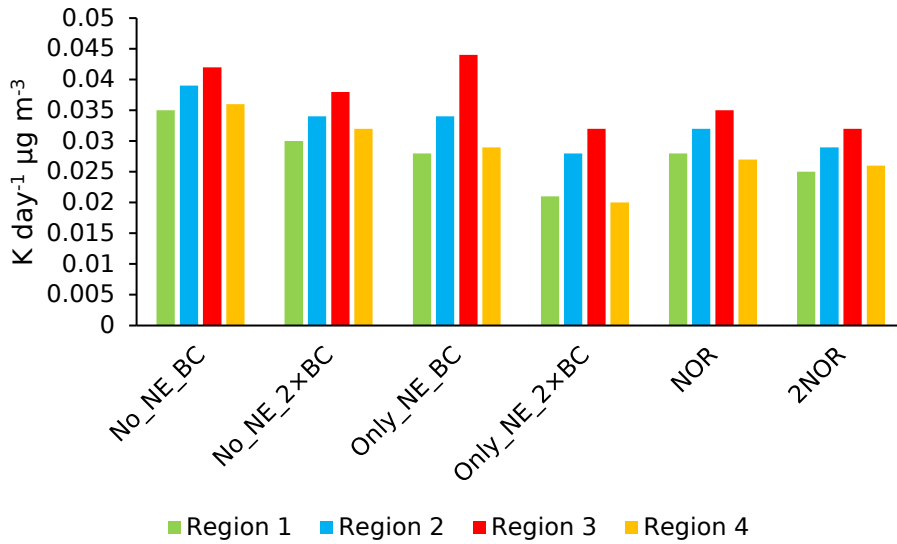

Figure S13: Region-wise HE in different scenarios

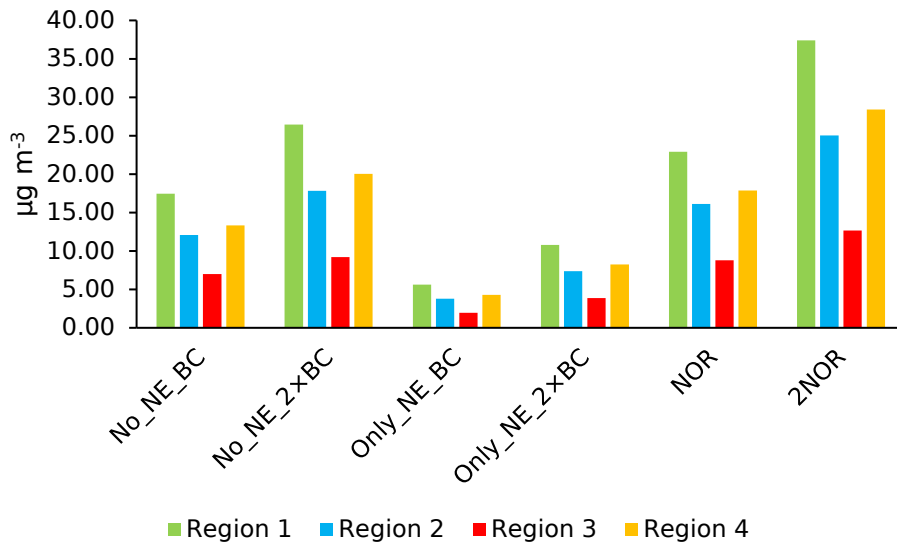

Figure S14: Column integrated BC concentration

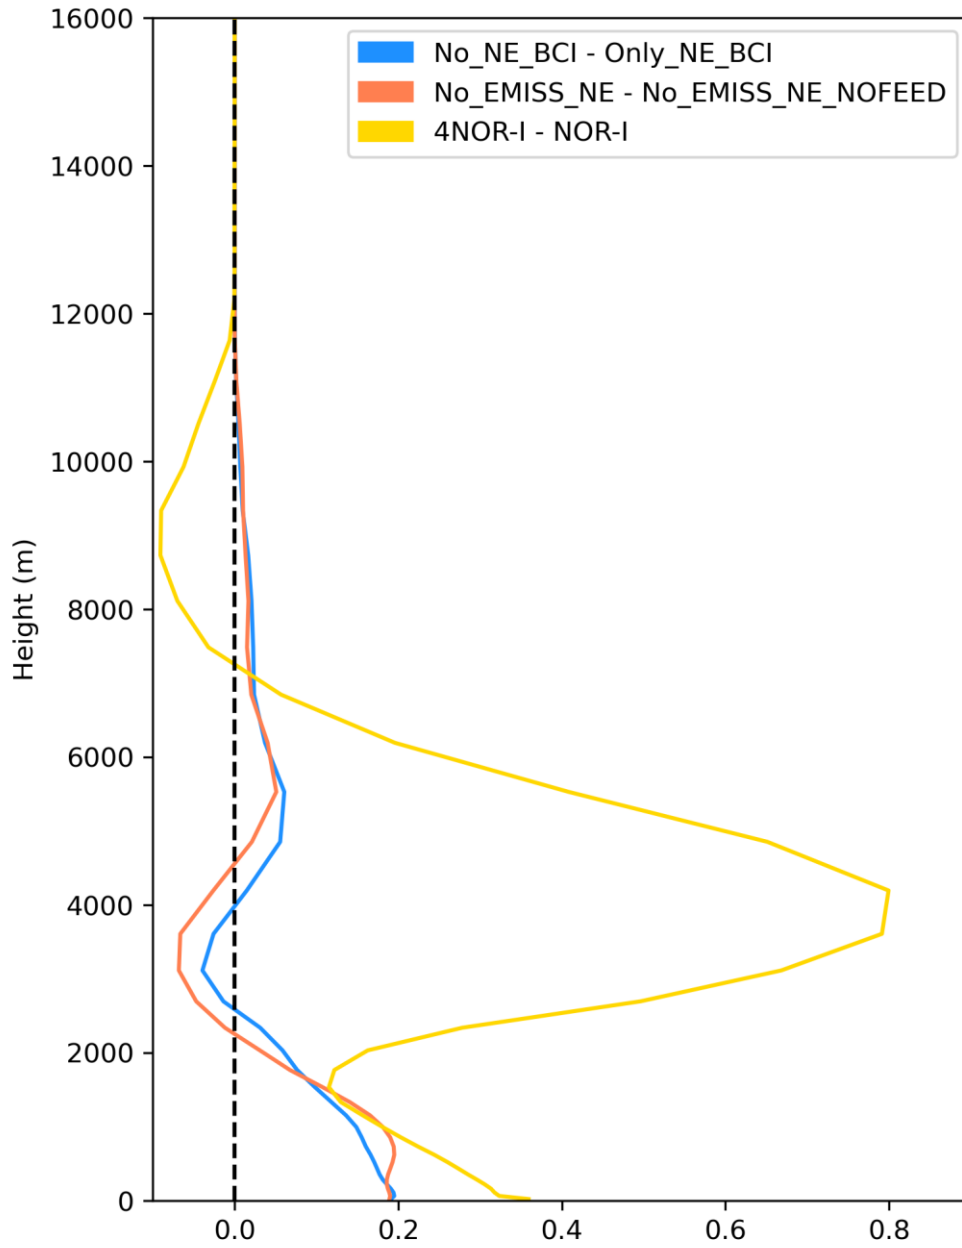

Figure S15: Regionally averaged vertical profiles of water vapor mixing ratio ( $\text{g kg}^{-1}$ ) perturbations

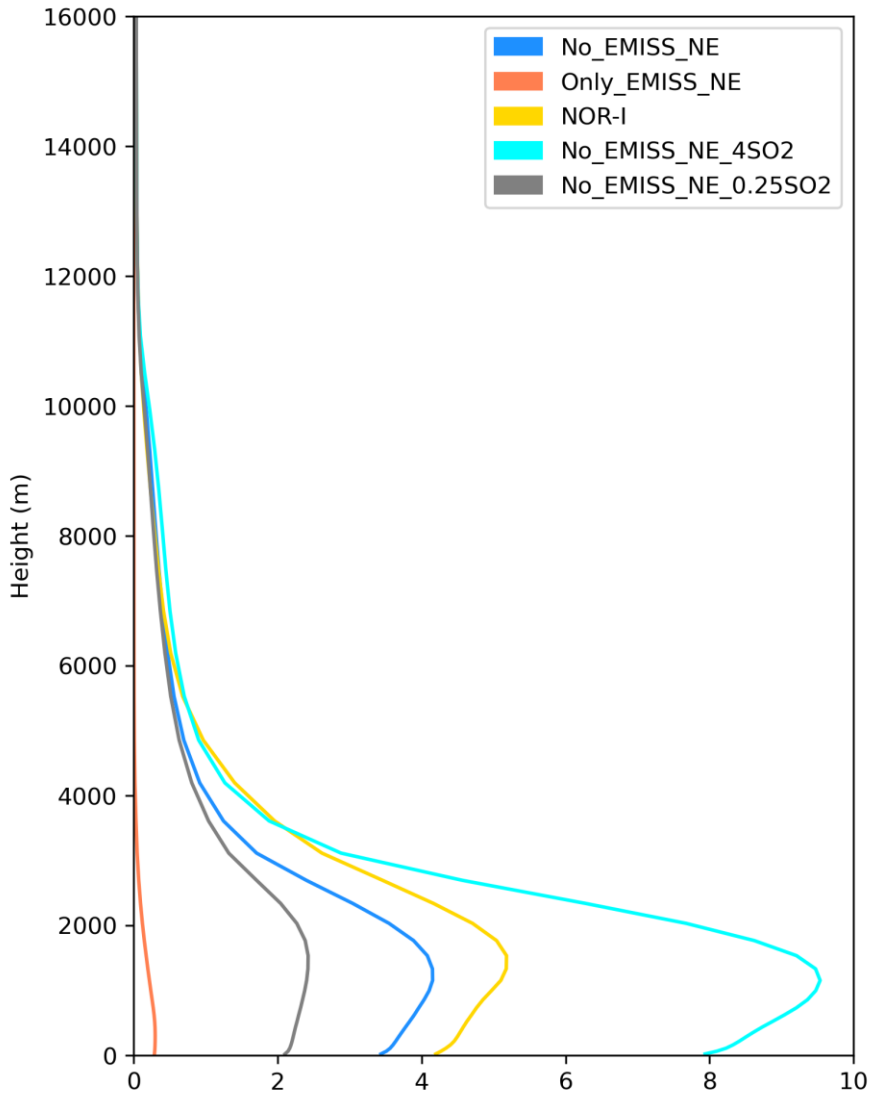

Figure S16: Regional average vertical profile of sulfate aerosol concentration ( $\mu\text{g m}^{-3}$ ) in different scenarios

Table S6: Amount of rainfall (mm) aerosol effects increase (inc) or decrease (dec) RAIN under different rainfall intensities

|                                                                  | inc_0_5 | inc_5_10 | inc_>10 | dec_0_5 | dec_5_10 | dec_>10 |
|------------------------------------------------------------------|---------|----------|---------|---------|----------|---------|
| Total aerosol effect (NOR-I – NOCHEM)                            | 6.17    | 9.99     | 137.16  | -6.50   | -10.61   | -411.34 |
| Direct + semi-direct effect (NOR-I – NOFEED-I)                   | 6.62    | 10.17    | 116.92  | -7.07   | -10.51   | -133.16 |
| Indirect effect (NOFEED-I – NOCHEM)                              | 6.52    | 10.24    | 141.62  | -6.48   | -10.57   | -399.41 |
| Total aerosol effect with BC increase (4NOR-I – NOCHEM)          | 5.13    | 8.81     | 275.47  | -6.52   | -10.10   | -337.23 |
| Direct + semi-direct effect with BC increase (4NOR-I – NOFEED-I) | 5.55    | 9.66     | 339.33  | -6.95   | -10.78   | -143.17 |
| BC increase (4NOR-I – NOR-I)                                     | 5.63    | 9.73     | 343.76  | -6.58   | -10.45   | -131.41 |



Table S7: Percentage (%) of simulation time aerosol effects increase (inc) or decrease (dec) RAIN under different rainfall intensities

|                                                                  | inc_0_5 | inc_5_10 | inc_>10 | dec_0_5 | dec_5_10 | dec_>10 |
|------------------------------------------------------------------|---------|----------|---------|---------|----------|---------|
| Total aerosol effect (NOR-I – NOCHEM)                            | 21.05   | 4.51     | 12.32   | 21.06   | 4.80     | 19.23   |
| Direct + semi-direct effect (NOR-I – NOFEED-I)                   | 22.37   | 4.61     | 10.85   | 24.18   | 4.78     | 11.38   |
| Indirect effect (NOFEED-I – NOCHEM)                              | 21.44   | 4.63     | 12.38   | 20.58   | 4.78     | 18.85   |
| Total aerosol effect with BC increase (4NOR-I – NOCHEM)          | 17.83   | 3.97     | 13.92   | 23.69   | 4.58     | 16.63   |
| Direct + semi-direct effect with BC increase (4NOR-I – NOFEED-I) | 17.79   | 4.36     | 16.51   | 24.08   | 4.87     | 12.74   |
| BC increase (4NOR-I – NOR-I)                                     | 18.45   | 4.39     | 16.55   | 23.57   | 4.72     | 12.34   |
